# Supplementary material for: Down-regulation of EZH2 genes targeting RUNX3 affects proliferation, invasion, and metastasis of human colon cancer cells by Wnt/β-catenin signaling pathway
Source: publisher site journal article supplement (doi:10.18632/aging.205197), 2023-12-02
Supplement: Supplementary file [file aging-v15i23-205197-supplementary-material-SD1.pdf]

SUPPLEMENTARY FIGURES

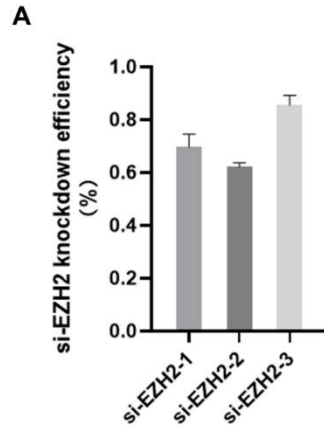

Supplementary Figure 1. si-EZH2 knockdown efficiency (%) ( $P < 0.05$ ). (A) Knockout efficiency of si-EZH2-1, si-EZH2-2 and si-EZH2-3 on EZH2.

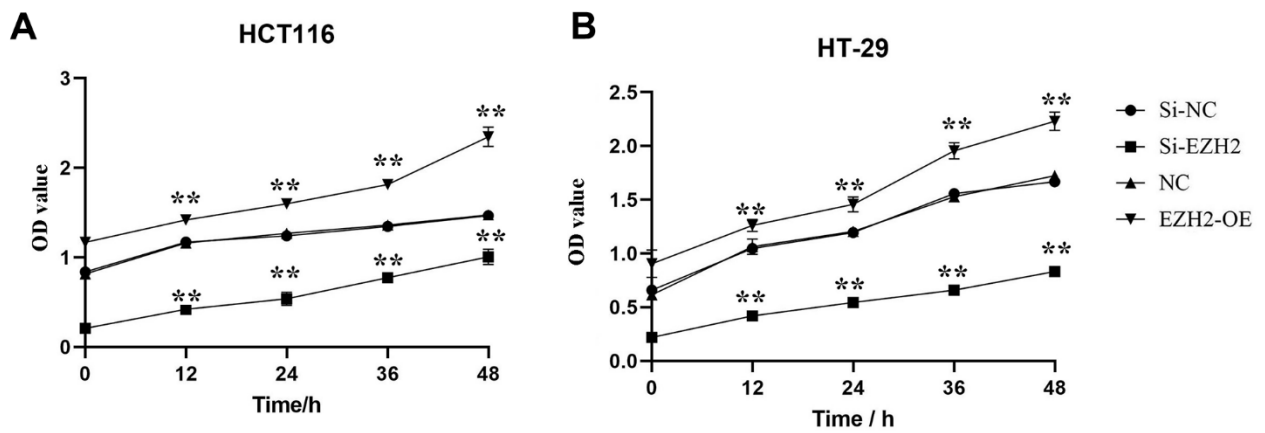

Supplementary Figure 2. Cell proliferation curve (OD value). (A) CCK8 shows the effect of EZH2 on the proliferative capacity of HCT116 cells; (B) CCK8 shows the effect of EZH2 on the proliferative capacity of HT29 cells. ( $***P < 0.001$ ,  $**P < 0.01$ ).
